# Supplementary material for: B-Vitamin Sharing Promotes Stability of Gut Microbial Communities
Source: Front Microbiol. 2019 Jul 2;10:1485. doi: 10.3389/fmicb.2019.01485 (PMC6615432; doi:10.3389/fmicb.2019.01485)
Supplement: Supplementary file 3 [file Table_2.XLSX]

## Sheet: 2A
Table S2A. Relative abundance of phylotypes determined in varied B vitamin media in in vitro experiments.
Phylum	Class	Order	Family	Genus	Species	Average relative abundance	# of OTUs	Average identity %	AD1	AD2	AD3	AD4	AD5	AD6	AN1	AN2	AN3	AN4	AN5	AN6	AE1	AE2	AE3	AE4	AE5	AE6	4D4N1	4D4N2	4D4N3	4D4N4	4D4N5	4D4N6	4E4N1	4E4N2	4E4N3	4E4N4	4E4N5	4E4N6	7D1N1	7D1N2	7D1N3	7D1N4	7D1N5	7D1N6	7E1N1	7E1N2	7E1N3	7E1N4	7E1N5
Bacteroidetes	Bacteroidia	Bacteroidales	Bacteroidaceae	Bacteroides	Bacteroides thetaiotaomicron	0.293965	47	97.9545	0.126796	0.0954677	0.382705	0.327937	0.244353	0.26541	0.213341	0.171305	0.151682	0.200706	0.358019	0.434767	0.370462	0.295714	0.340121	0.349388	0.212722	0.360001	0.234339	0.139762	0.394356	0.391875	0.359564	0.360919	0.309967	0.316831	0.360961	0.422823	0.15053	0.393188	0.235512	0.149106	0.360137	0.40197	0.28476	0.343623	0.37095	0.2979	0.32899	0.392785	0.212946
Proteobacteria	Gammaproteobacteria	Enterobacterales	Enterobacteriaceae	Escherichia	Escherichia fergusonii	0.188527	82	98.7191	0.190104	0.171067	0.206338	0.191029	0.258396	0.189967	0.228174	0.267306	0.28552	0.153017	0.187923	0.140974	0.185088	0.0815372	0.205506	0.184089	0.235563	0.0814996	0.21978	0.251715	0.154072	0.120617	0.188559	0.177633	0.102461	0.156639	0.106792	0.125605	0.298232	0.211028	0.176584	0.22413	0.160807	0.189305	0.187928	0.216162	0.185852	0.202885	0.196316	0.0833363	0.273448
Firmicutes	Clostridia	Clostridiales	Clostridiaceae	Clostridium	Clostridium perfringens	0.0604771	17	98.9606	0.0809768	1.2e-05	0.0584058	0.0039917	0.071892	2.92e-05	7.57e-06	1.39e-05	0.000594	1.345e-05	0.107216	0.042321	0.0581811	0.157201	0.083801	0.16042	0.069604	0.138585	3.2e-05	0.068931	0.009995	0.117975	0	0.0013555	0.243117	0.103535	0.0704747	0.0651331	0	0.0707722	0.000554	5.6e-05	0.116998	0.127785	0.0563193	0.082947	0.0801596	0.0432403	0.055978	0.07491	0.000288
Firmicutes	Clostridia	Clostridiales	-	Flavonifractor	Flavonifractor plautii	0.054638	14	98.0721	0.0453828	0.0522078	0.0616456	0.0575698	0.0727281	0.0650695	0.061774	0.0612032	0.092606	0.0823004	0.0514295	0.064707	0.0526191	0.0420792	0.045707	0.0420266	0.0723236	0.0115545	0.0614597	0.02093	0.0715335	0.0615455	0.035394	0.0623204	0.030956	0.0415801	0.082627	0.014973	0.0562691	0.0369942	0.030339	0.0641763	0.0443717	0.0623596	0.074895	0.093298	0.0178151	0.0545532	0.0421133	0.0748102	0.083452
Firmicutes	Tissierellia	Tissierellales	Peptoniphilaceae	Peptoniphilus	Peptoniphilus grossensis	0.0438375	8	98.9175	0.163794	0.16457	0.0102321	0.0821315	0.0306441	0.0514415	0.0308101	0.195243	0.134822	0.0204258	0.0204012	0.000194	0.0620543	0.000202	0.030793	0.0105072	0.00181	0.0309681	0.0410864	0.020465	0.0101655	0.061757	0.05157	0.0060967	0.050966	0.0057835	0.0003693	0.0083158	0.00224611	0.0081174	0.224244	0.020672	0.0717465	0.0411236	0.0307312	0.009647	0.0208942	0.0411306	0.0093283	0.00119692	0.021151
Verrucomicrobia	Verrucomicrobiae	Verrucomicrobiales	Akkermansiaceae	Akkermansia	Akkermansia muciniphila	0.0421303	11	98.9418	0.230668	0.281826	0.0100242	0.0040008	0.00927986	0.0717331	0.00748814	0.0010852	0.001056	0.0508776	0.0021012	0.007094	0.013531	0.0247244	0.018779	0.0171972	0.012436	0.0407389	0.0453407	0.000465	0.0420775	0.0110919	0.025168	0.00685	0.037194	0.0089891	0.0464644	0.0574978	0.00306871	0.0225314	0.117545	0.267992	0.0109884	0.0104389	0.0871889	0.009259	0.0455027	0.0126068	0.0309209	0.0401037	0.014027
Bacteroidetes	Bacteroidia	Bacteroidales	Bacteroidaceae	Bacteroides	Bacteroides faecis	0.0386528	13	99.1654	0.0156242	0.0319887	0.0165765	0.0632078	0.0244011	0.0261083	0.109238	0.0220553	0.029358	0.0348265	0.030452	0.0414235	0.0513993	0.060138	0.0546392	0.0177443	0.028193	0.0315406	0.0269622	0.012646	0.035971	0.0561733	0.05855	0.050565	0.017738	0.0860704	0.0673415	0.052067	0.0121829	0.0546494	0.008851	0.021082	0.0503813	0.0503268	0.0363703	0.054214	0.020772	0.0569186	0.0210121	0.0152436	0.049773
Bacteroidetes	Bacteroidia	Bacteroidales	Bacteroidaceae	Bacteroides	Bacteroides caccae	0.0306832	12	98.0467	0.0214304	0.0113303	0.0268185	0.0096766	0.023359	0.025152	0.0629816	0.0246311	0.021584	0.0228328	0.0257398	0.02581	0.0257985	0.0126854	0.0362516	0.0237963	0.0369916	0.0233332	0.0236875	0.03381	0.0290915	0.0243636	0.047869	0.0504466	0.033866	0.0468568	0.0252143	0.0356648	0.0329439	0.0481538	0.0224	0.0227732	0.035109	0.023989	0.0235975	0.048383	0.0236227	0.0372393	0.0442673	0.0360972	0.034314
Bacteroidetes	Bacteroidia	Bacteroidales	Bacteroidaceae	Bacteroides	Bacteroides vulgatus	0.0278771	18	98.2522	0.0198362	0.0175328	0.0204593	0.0310866	0.0215033	0.0232865	0.0213377	0.0440163	0.031214	0.0462798	0.0197081	0.022582	0.0204993	0.0243364	0.0199792	0.0219056	0.0612807	0.0270225	0.035319	0.077767	0.0187525	0.0255514	0.020119	0.0257892	0.039537	0.0189834	0.0295303	0.0208829	0.0393821	0.015486	0.025313	0.0282454	0.0177044	0.0157762	0.0219002	0.03587	0.0260745	0.0218984	0.0242445	0.0279835	0.042579
Firmicutes	Clostridia	Clostridiales	-	Pseudoflavonifractor	Pseudoflavonifractor phocaeensis	0.0246542	7	96.7786	0.022549	0.0010169	0.0038357	1.23e-05	0.0050389	0.042022	0.0109392	0.015537	0.028172	8.045e-05	0.013816	0.000645	0.0750303	0.0057932	0.043172	0.030269	0.031005	0.017257	0.0420819	0	0.0531955	0.031915	0.03719	0.014868	0.030849	0.0418263	9.23e-05	0.010478	0.0121827	0.009206	0	5.6e-05	0.028697	0.00384033	0.0526396	0	0.06275	0.0419736	0.0425035	0.0864159	0.085468
Firmicutes	Tissierellia	Tissierellales	Peptoniphilaceae	Finegoldia	Finegoldia magna	0.0212389	4	96.575	0.010572	0.0081088	0.0023775	0.05415	0.000568	0.0615963	0.0306816	0.061127	0.09211	0.0507404	0.0201751	0.04394	0.021614	0.0079808	0.0100792	0.0019162	0.0022205	0.00080863	0.063093	0.000744	0.050705	0.0093723	0.020675	0.010438	0.00301	0.020557	0.0102773	0.000367	0.04051	0.0201494	0.033135	0.032214	0.00083034	0.0072022	0.000589	0.000381	0.0026548	0.020742	0.0202735	0.00258	0.030144
Bacteroidetes	Bacteroidia	Bacteroidales	Bacteroidaceae	Bacteroides	Bacteroides uniformis	0.0168544	10	98.739	0.0140916	0.0140635	0.0105112	0.0180411	0.0224805	0.0214187	0.0125823	0.0199731	0.017556	0.0245506	0.0123594	0.0133045	0.0069319	0.020989	0.012442	0.0096932	0.0331021	0.0154508	0.0174572	0.051768	0.009832	0.0194592	0.010119	0.0212306	0.012359	0.0091925	0.0162993	0.0162631	0.0196591	0.0091334	0.017704	0.022804	0.0086908	0.0107527	0.0229975	0.021682	0.0123405	0.0142973	0.0113862	0.0188054	0.017694
Firmicutes	Clostridia	Clostridiales	-	Flintibacter	Flintibacter butyricus	0.015943	2	97.41	0	0	0.12354	0	0.12257	7.32e-06	0	1.39e-05	0	0	0.010276	0	4.03e-05	0.13345	0	0.010326	0.000267	0.0018465	0	0	0.000166	0	0.000225	0.08202	0	0.030467	0	0	9.11e-06	0	0.000185	0	1.4e-05	9.13e-06	0	0	2.48e-05	0	0.10283	0.05132	0
Firmicutes	Negativicutes	Acidaminococcales	Acidaminococcaceae	Phascolarctobacterium	Phascolarctobacterium faecium	0.0133587	4	99.405	0	1.2e-05	1.94e-05	1.23e-05	0	0	0.102242	4.18e-05	6.6e-05	0	2.51e-05	0.005938	0	0	0	0.0103622	4.1e-05	0.05116	0.08178	0.052141	0.000996	0	0.031125	0	0.040752	4.45e-05	0	0.041141	0	3.74e-05	0	0	0	0	2.03e-05	0	0	0.071412	0	1.69e-05	0
Bacteroidetes	Bacteroidia	Bacteroidales	Tannerellaceae	Parabacteroides	Parabacteroides merdae	0.0116286	3	99.4967	0.010572	0.0105749	0.0104454	0.031071	0.0103252	0.0103732	0.0103939	0.0103475	0.006532	0.0085453	0.0082962	0.010516	0.0206043	0.0078532	0.0082392	0.0094392	0.008988	0.0103909	0.020639	0.010279	0.051657	0.0106366	0.010225	0.0097347	0.00548	0.0102445	0.010231	0.0104485	0.007575	0.009274	0.01037	0.0107011	0.0105308	0.010621	0.0090742	0.010381	0.0086123	0.0103176	0.0106205	0.0079367	0.010432
Bacteroidetes	Bacteroidia	Bacteroidales	Bacteroidaceae	Bacteroides	Bacteroides massiliensis	0.00964124	7	99.1629	0.000107	0.0003118	0.0002904	0.0024289	0.0001135	0.0011046	0.0105016	0.0138339	0.012996	0.00933415	0.027396	0.029613	0.01168	0.003491	0.01204	0.009541	0.031231	0.0140913	0.0023567	0.012278	0.004151	0.0096709	0.011919	0.0033407	0.011499	0.013441	0.0144862	0.006931	0.0144974	0.014528	0.001108	0.000897	0.00158069	0.002465	0.0003662	0.002918	0.0260396	0.014578	0.0106474	0.0075749	0.010357
Bacteroidetes	Bacteroidia	Bacteroidales	Bacteroidaceae	Bacteroides	Bacteroides ovatus	0.00760815	7	99.4129	0.005659	0.009452	0.0086335	0.0076485	0.0075773	0.0099156	0.00630394	0.0146528	0.013846	0.0114852	0.0045582	0.006325	0.0056783	0.007484	0.0074472	0.003837	0.0091345	0.0044574	0.0085102	0.017065	0.0052695	0.0066659	0.008315	0.0061393	0.005262	0.0052798	0.0027717	0.0009375	0.0121231	0.0065874	0.011265	0.0139861	0.00826841	0.0049335	0.0068233	0.013711	0.002601	0.0061783	0.0057666	0.00571116	0.007763
Firmicutes	Clostridia	Clostridiales	Ruminococcaceae	Agathobaculum	Agathobaculum desmolans	0.00610591	3	95.79	0	0.0202869	0.000368	0.020234	3.79e-05	0.0304313	0	5.57e-05	6.6e-05	0.0707881	0.0005771	0.000839	0.0006035	0.000384	7.92e-05	0.000181	0.0001026	0.0025031	4.26e-05	0	0.0034845	0.000576	0.00045	0.030395	0.00118	0.000557	9.23e-05	4.08e-05	0.0407111	7.48e-05	0.020369	5.61e-05	0.00032268	0.000411	0.0001423	0.000889	0.000521	0	0.000174	4.23e-05	0.00834
Firmicutes	Clostridia	Clostridiales	-	Pseudoflavonifractor	Pseudoflavonifractor capillosus	0.00596201	2	98.085	0	0	0	0	0	0	0	0	0.000132	0	0.0100501	0	0	0	0	0.0400723	0.0200205	0	0	0.070093	0	0	0	0.03	0	0	0.03	0	0.0500365	0	0	0	0	0	0	0	0	0	0	0	0
Actinobacteria	Coriobacteriia	Eggerthellales	Eggerthellaceae	Eggerthella	Eggerthella lenta	0.00469723	4	99.6	0.0068058	0.0050659	0.0047824	0.010572	0.016158	0.009117	0.005971	0.010631	0.00871	0.0047814	0.0034071	0.004645	0.004103	0.0030524	0.000951	0.003035	0.004223	0.0015767	0.0060282	0.00419	0.0020755	0.002581	0.000899	0.0050029	0.000322	0.0044478	0.0087762	0.005462	0.007329	0.004002	0.001846	0.004543	0.0029824	0.0035779	0.0024166	0.006477	0.0023824	0.002544	0.001638	0.0007879	0.005324
Bacteroidetes	Bacteroidia	Bacteroidales	Tannerellaceae	Parabacteroides	Parabacteroides distasonis	0.00466972	7	99.38	0.002395	0.0026089	0.0065088	0.0124889	0.00951182	0.00612994	0.00713537	0.0028108	0.00357	0.0032983	0.0056203	0.0041945	0.003177	0.0046602	0.00412	0.0031804	0.0074636	0.0032644	0.003365	0.00344	0.004482	0.0053403	0.002695	0.0056539	0.005477	0.0028243	0.0038262	0.0057846	0.00216331	0.0045594	0.000923	0.002329	0.00375009	0.00548483	0.00346	0.01257	0.002337	0.00374	0.0035028	0.00401536	0.00445
Firmicutes	Clostridia	Clostridiales	Lachnospiraceae	Dorea	Dorea formicigenerans	0.00430986	3	98.6367	0	0.031149	1.94e-05	0	0	0	0.021007	0	0	0	0.021103	0	0	0	0	0	0.0044742	0.031021	2.13e-05	0	0	0	0	0	0	0.021046	0.020276	0	9.11e-06	0.030674	0.000185	0	2.34e-06	1.83e-05	0	0	0	0	0	8.46e-06	0
Bacteroidetes	Bacteroidia	Bacteroidales	Bacteroidaceae	Bacteroides	Bacteroides dorei	0.00375756	3	98.3333	0.001396	0.002621	0.001412	0.0023106	0.0057649	0.001271	0.00219	0.003733	0.003628	0.00428335	0.001977	0.001806	0.000926	0.0023	0.002615	0.002424	0.030615	0.00231163	0.002364	0.00465	0.002486	0.007094	0.00292	0.0047377	0.003542	0.003802	0.001943	0.001059	0.00277	0.001384	0.002033	0.0059451	0.00326168	0.0102555	0.0013193	0.00521	0.002231	0.00272	0.001591	0.0029689	0.002593
Firmicutes	Clostridia	Clostridiales	Clostridiaceae	Hungatella	Hungatella hathewayi	0.00371252	1	100	0	0	1.94e-05	0	0	0	7.57e-06	0	0.03	0	0.01	0	0	4.04e-05	0.03	0	0	0	0	0	0	0	0	0	0.00387	0	0.02	0	0	0	0.02	0	0	0	0	0	0.04	0.00198	0	8.46e-06	0
Firmicutes	Clostridia	Clostridiales	Peptostreptococcaceae	Paeniclostridium	Paeniclostridium sordellii	0.0036124	3	99.24	0	0.000754	0	0.040505	0	0.00070932	0	0	0	0.070606	0	0.010194	0	0.00293	0.000396	0	0	0.0038364	0	0	0	6.06e-05	0	0.000439	0.00838	0	0.0030962	0.00758	0.00067422	0	0	2.8e-05	0	0	0.000122	0	0	0	0	0.00141	0
Firmicutes	Tissierellia	Tissierellales	Peptoniphilaceae	Peptoniphilus	Peptoniphilus phoceensis	0.00334213	3	99.09	0.0003218	0.0003829	0	0.0010103	9.46e-06	0.00259932	4.54e-05	0.000376	0.000132	0.055772	5.01e-05	0.0001935	0.000161	0	0	3.62e-05	0	0.0001259	5.33e-05	0.02298	0	0.000455	0	0	0.000107	0	0	0	0.0004195	0.0049364	0.00148	0.045604	0.0027214	5.48e-05	2.03e-05	0.000127	0	0.000106	4.96e-05	0	0
Firmicutes	Tissierellia	Tissierellales	Peptoniphilaceae	Peptoniphilus	Peptoniphilus gorbachii	0.00317841	1	100	0.000107	3.59e-05	0	8.62e-05	0.000208	0.000117	0	0.000139	6.6e-05	0.000127	2.51e-05	0	8.05e-05	0	0	0	0	1.99e-05	1.07e-05	0.000744	4.15e-05	9.1e-05	0.000225	0	0.000107	0.000134	0.01	0	0.12	3.74e-05	0.000369	8.41e-05	0.000122	0	0	0	0	0.000177	0	0	0.000144
Firmicutes	Clostridia	Clostridiales	Clostridiaceae	Clostridium	Clostridium subterminale	0.00312065	2	97.62	0	0	0	0	0	0	0	0	0	0	0	0	0	0.008478	0	0	0	0.03211	0	0.006701	0	3.03e-05	0	0	0	0	0	0.06387	9.11e-06	0	0	2.8e-05	0	0	0	0	0.008161	0	0	0	0
Firmicutes	Clostridia	Clostridiales	Lachnospiraceae	Anaerotignum	Anaerotignum lactatifermentans	0.00307889	2	95.06	0	0	0	0	0	7.32e-06	0	0	0	3.35e-06	0	0	4.03e-05	0.06	0.00301	0.0001452	0	0.00886	0	0	0	3.03e-05	0	0	0	0.02	0	0	0	0	0	2.8e-05	0	0	0	0	0	7.06e-05	0.01782	0.01922	0
Bacteroidetes	Bacteroidia	Bacteroidales	Tannerellaceae	Parabacteroides	Parabacteroides goldsteinii	0.00284933	2	99.455	3.58e-05	3.59e-05	0.00141	0.000369	0	0.0200439	0	0	0	0.0013701	0.00113	0.00497	0.000403	0.0030304	0	0.000181	0	0.000126	0.00117	0	0	0.00558	0.02	0	0.000752	0	0.0063662	0	0.0100182	0.0034774	0	0.000112	0.0044217	0.000201	0.0300203	0	0.00213	0	0	0.000288	0
Bacteroidetes	Bacteroidia	Bacteroidales	Bacteroidaceae	Bacteroides	Bacteroides xylanisolvens	0.00270064	5	99.216	0.0020036	0.0110718	0.0016468	0.002462	0.0025398	0.0026948	0.0023224	0.006205	0.00587	0.007606	0.0010014	0.001614	0.0028595	0.002923	0.001983	0.0014472	0.002283	0.001837	0.002332	0.004838	0.001451	0.0013629	0.001125	0.002018	0.001396	0.0026743	0.0005544	0.0002038	0.007073	0.0025834	0.002953	0.004851	0.0022888	0.0016745	0.0022332	0.000889	0.0011164	0.002186	0.0018153	0.0019002	0.002443
Firmicutes	Clostridia	Clostridiales	Ruminococcaceae	Neglecta	Neglecta timonensis	0.00261302	2	90.415	0.0024	0.00305	7.74e-05	0.00016	0	3.66e-05	0	0.0013739	0	0.00306335	0.0016251	0.00206	0.00165	6.06e-05	0.000158	0.000326	8.21e-05	1.99e-05	0.0089507	0	0.0100415	0	0.01	0	0.000107	0.000289	0.030185	0	0.00323	0.000449	0.00443	2.8e-05	0.00359468	0.00163	0.00414	0.000508	0.00859	0.000388	0.000496	0.000279	0.00619
Firmicutes	Clostridia	Clostridiales	Lachnospiraceae	Blautia	[Ruminococcus] gnavus	0.00251175	3	99.5433	0	3.59e-05	0	0.0075046	0.0100495	0.0276866	0.0147479	0	6.6e-05	0	0.0024521	0	0	0	0.0042	0.001411	0	0.0138098	0	0	0	0	0.000225	0	0.005907	0.001736	0	0.00106	0	0.000936	0	0	0	0.000731	0	0	0	0.0058353	0.00464	0	0
Firmicutes	Clostridia	Clostridiales	Clostridiaceae	Clostridium	Clostridium paraputrificum	0.00242833	1	100	0	0.00169	0.00544	0	0	0.00956	0	1.39e-05	0	0.00481	0	0.000387	0	0	0	0	0	0	0	0	0	0.00152	0	0.00399	0	0.02	0	0	0	0	0.00332	0.00465	0	9.13e-06	0.00363	0	0	0.00297	0	0	0.04
Bacteroidetes	Bacteroidia	Bacteroidales	Bacteroidaceae	Bacteroides	Bacteroides caecimuris	0.00235128	13	97.8977	0.0003934	0.0048709	0.0015095	0.0021013	0.00081292	0.00230956	0.0080513	0.002515	0.004884	0.00096215	0.0007774	0.0024495	0.000846	0.0008484	0.0014264	0.0017356	0.001989	0.00319942	0.007254	0.001395	0.002319	0.0015766	0.008995	0.00377	0.000967	0.0008686	0.001524	0.00159	0.00460622	0.0010848	0	0.000841	0.00076245	0.00144336	0.0037716	0.002159	0.0030998	0.001518	0.000844	0.00203126	0.004026
Firmicutes	Clostridia	Clostridiales	Catabacteriaceae	Catabacter	Catabacter hongkongensis	0.00207321	1	100	0.0053	0.00557	0.00306	8.62e-05	0.000237	5.85e-05	0.000159	0.00271	0.00554	0.00229	0.00125	0.0031	0.00306	0.000747	7.92e-05	0.000145	0.00308	2.65e-05	0.00457	0.00214	0.0029	0.00146	0.00382	0.00254	0	0.000156	0.00129	0.000285	0.00414	3.74e-05	0.00203	0.00418	0.00363	0.000913	0.00329	0.00597	0.00154	0.000106	0	0.000516	0.00475
Firmicutes	Bacilli	Lactobacillales	Enterococcaceae	Enterococcus	Enterococcus faecalis	0.00199452	1	100	0	1.2e-05	1.94e-05	0	2.84e-05	0	0	0	0.00884	0.000101	0.00218	0.02	0	0	0.00943	0.000181	0.00743	0	6.39e-05	0	0	0	0	0	0	0.0018	0	0	0.03	0	0	0	2.1e-05	0	0	0	0	0.000353	0	0	0.00331
Firmicutes	Clostridia	Clostridiales	Lachnospiraceae	Dorea	Dorea longicatena	0.00172548	1	99.77	3.58e-05	0	1.94e-05	8.62e-05	1.89e-05	0	0	2.78e-05	0	3.02e-05	0.0001	0	0	2.02e-05	0	0	0.03	0.00695	1.07e-05	0.03	0	0	0	0.00132	0.00129	2.23e-05	0	4.08e-05	1.82e-05	0	0	5.61e-05	3.04e-05	0.000128	2.03e-05	0	0	0	2.48e-05	0.00113	0
Firmicutes	Erysipelotrichia	Erysipelotrichales	Erysipelotrichaceae	Dielma	Dielma fastidiosa	0.00156691	1	98.28	0	3.59e-05	0	0	0.00529	0	0	0	0	0.02	0	0	0	0	0.000475	0	0	0	0	0	0	0	0	0	0	0	0	0	0	0	0.01	0	0	9.13e-06	0.03	0	0	0	0	0	0
Bacteroidetes	Bacteroidia	Bacteroidales	Bacteroidaceae	Bacteroides	Bacteroides salyersiae	0.00148057	2	99.24	0.001432	0.002	0.000639	0.001539	0.000975	0.00305	0.0026	0.00337	0.001912	0.0045	0.000852	0.001484	0.000765	0.001837	0.001347	0	0	0.002125	0.00373	0.00298	0.001245	0.000607	0.001574	0.001361	0.00043	0	0	0.0003668	0	0.001422	0	0.00342	0.00165	0.001287	0.001949	0.001016	0.001315	0	0.001092	0.00292	0.001438
Firmicutes	Clostridia	Clostridiales	Clostridiaceae	Clostridium	Clostridium saudiense	0.00143407	2	100	0	1.2e-05	0	0	1.89e-05	0	0	0	0	0	2.51e-05	0	0	0	0	0	0	6.63e-06	0	0.06	4.15e-05	0	0	0	0	0	0	0	0	0	0	0	0	0	0	0.000127	0	0	0	0	0
Actinobacteria	Coriobacteriia	Coriobacteriales	Coriobacteriaceae	Collinsella	Collinsella aerofaciens	0.00128823	1	100	0.000501	0.000108	0.000851	0.000862	0.00117	6.58e-05	0.000515	0.000139	0.000924	7.37e-05	0.000827	0.000323	0.00451	0.00311	0.0023	0.00365	0.00127	0.00136	0.000821	9.3e-05	0.00154	0.00315	0.00045	0.00184	0.0014	0.00118	0.000323	0.00183	0.000319	0.00284	0	0	0.0014	0.00143	0.000122	0.00127	0.00134	0.00611	0.00107	0.000948	0
Firmicutes	Clostridia	Clostridiales	Ruminococcaceae	Anaerotruncus	Anaerotruncus colihominis	0.0012571	61	96.7711	0.000895	0.0012093	7.76e-05	0.0002828	0	5.854e-05	8.327e-05	0.0005839	6.6e-05	0.00229415	0.0018266	0.0017415	0.0015328	0.000363	0	0.0001812	8.2e-05	0	0.0053017	0.000186	0.003358	0.0001212	0.004275	8.77e-05	0.000214	0.0002005	0.0078482	0	0.002305	0.0003736	0.002586	0	0.00155497	0.00106808	0.0023759	0.000127	0.0049403	0.0002824	0.0001736	0.00097336	0.003168
Firmicutes	Clostridia	Clostridiales	Ruminococcaceae	Hydrogenoanaerobacterium	Hydrogenoanaerobacterium saccharovorans	0.00115295	1	94.77	0.0014	0.000742	0.0006	0.00122	0.000719	0.000936	0.00113	0.00163	0.00244	0.00211	0.0014	0	0.00121	0.000747	0.000871	0.00166	0.00185	0.00132	0.00119	0.00102	0.0012	0.000819	0.000225	0.0011	0	0.00149	0	0.00208	0.0027	0.0021	0	0.00107	0.000956	0.00116	0.00112	0	0.00109	0.00113	0.00179	0.00164	0.000719
Firmicutes	Erysipelotrichia	Erysipelotrichales	Erysipelotrichaceae	Coprobacillus	Coprobacillus cateniformis	0.00111215	1	98.49	0.000537	0.000156	0.00333	0.000222	0.000265	6.58e-05	0.00216	0.000306	0.000132	5.36e-05	0.01	0.01	0.00177	0.000182	0.00119	0.00177	0.00105	0.000398	0.000884	0	0.000913	6.06e-05	0.00157	0.000132	0	0.00276	0.000185	8.15e-05	0.000137	0.00168	0	0	0.000655	0.00042	0	0.000127	0.000174	0.00145	0.000223	6.77e-05	0.00129
Firmicutes	Clostridia	Clostridiales	Clostridiaceae	Clostridium	Clostridium tertium	0.00102429	1	100	0	0	0	0	0	0	0	0	0	0	0	0	0	0	0	0	0.01	0	0	0	0	0	0	0.01	0	0	0	0	0	0	0	0.01	0	0	0	0.00673	0	0	0	0	0
Firmicutes	Tissierellia	Tissierellales	Peptoniphilaceae	Peptoniphilus	Peptoniphilus coxii	0.00102098	2	99.09	0	8.38e-05	1.94e-05	0	0	0.00157	0.00259	0.0009465	6.6e-05	0.000677	0	0	0	0	0.0043592	0	0	6.63e-06	0.000416	0	0.0012	0	0.0009	8.77e-05	0.000107	6.68e-05	0	0	0.000292	0	0	0.01	0.00166	0	0.0077109	0	2.48e-05	0.0003173	0	0.00158	0.0082
Firmicutes	Clostridia	Clostridiales	Lachnospiraceae	Lachnoclostridium	Lachnoclostridium pacaense	0.00101938	2	95.795	0	0	0	0	0	1.46e-05	0	0	0	0	0	0	0	0	0.001109	0	0.02794	0	0	0	0	0	0	0	0	0	0	0	0	0	0	0	2.34e-06	0	0	0	0.003818	0	0	0	0
Bacteroidetes	Bacteroidia	Bacteroidales	Bacteroidaceae	Bacteroides	Bacteroides faecichinchillae	0.000999811	7	98.4486	0.000179	0.0003588	0.0005418	0.0006401	0.0003121	0.0007825	0.00046937	0.0005981	0.000198	0.0043329	0.000351	0.000903	0.000483	0.0004648	0.000713	0.0004704	0.0004306	0.00060266	0.0006293	0.000558	0.000704	0.0009406	0.000899	0.0006578	0.000644	0.000556	0.0022583	0	0.00030031	0.0003738	0.000185	0.0005051	0.00055866	0.0005657	0.0143573	0.001905	0.0002982	0.0005292	0.0002729	0.00055036	0.000288
Firmicutes	Clostridia	Clostridiales	Lachnospiraceae	Lachnoclostridium	[Clostridium] hylemonae	0.000952381	1	99.77	0	0.04	0	0	0	0	0	0	0	0	0	0	0	0	0	0	0	0	0	0	0	0	0	0	0	0	0	0	0	0	0	0	0	0	0	0	0	0	0	0	0
Firmicutes	Clostridia	Clostridiales	Ruminococcaceae	Gemmiger	Gemmiger formicilis	0.000872897	5	96.866	0.0014316	0.0002629	0.0005804	0.0018385	0.00024626	0.0004463	0.0012611	0.0016118	0	0.0018672	0.000125	0.000903	0.000201	0.0006662	0.000317	0.0003253	0.000738	0.0002921	0.0045166	0.000186	0.001867	0.0003946	0.00247	8.77e-05	0.000215	0.0001558	0.00434	0.000611	0.00133671	0.0010098	0	0.000252	0.0017265	0.00050256	0.000569	0	0.0001984	7.06e-05	9.93e-05	0.00058436	0.00216
Firmicutes	Clostridia	Clostridiales	Ruminococcaceae	Anaerofilum	Anaerofilum pentosovorans	0.000623676	2	96.72	0.000358	0.000108	0.0004834	0.0006776	0.000104	0.00021232	0.0003251	0.000404	0.000726	1.01e-05	0.000201	0.000839	0.00109	0.000464	0.000158	0.000217	0.000164	0.000152	0.0004267	0.000186	0.000498	0.000243	0.00112	0.000439	0.000322	0.0006675	0.000646	0.000897	0.00041011	0.000823	0.00129	8.41e-05	0.0001967	0.000137	8.12e-05	0	0.000223	0.00053	0.000521	0.00037246	0.009348
Firmicutes	Clostridia	Clostridiales	Lachnospiraceae	Lachnoclostridium	[Clostridium] scindens	0.000553632	2	99.885	3.58e-05	0	0	0	0	0	0	0.02317	0	0	0	0	0	0	0	0	0	0	0	0	0	0	0	0	0	0	0	0	9.11e-06	0	0	0	2.34e-06	0	0	0	0	3.53e-05	0	0	0
Firmicutes	Clostridia	Clostridiales	Peptostreptococcaceae	Paeniclostridium	[Eubacterium] tenue	0.000469892	1	100	0	8.38e-05	0	0.00504	0	1.46e-05	7.57e-06	0	0	0.00865	0	0.00135	0	0.000586	7.92e-05	0	0	0.000219	0	0	0	0	0	0	0.00107	0	0.000877	0.00151	0	0	0	0	0	0	2.03e-05	0	0	0	0	0.000228	0
Firmicutes	Clostridia	Clostridiales	Ruminococcaceae	Ruminococcus	Ruminococcus lactaris	0.000370044	1	99.32	0	1.2e-05	1.94e-05	0	9.46e-06	7.32e-06	7.57e-06	0	0	2.35e-05	2.51e-05	0.000129	0.000242	0.00151	0	0.000109	2.05e-05	0.00461	0.00224	0	0	0.000879	0.0054	0	0	0	0	4.08e-05	3.65e-05	3.74e-05	0	0	2.81e-05	0	0	0	2.48e-05	3.53e-05	0	1.69e-05	0
Firmicutes	Clostridia	Clostridiales	Ruminococcaceae	Acetanaerobacterium	Acetanaerobacterium elongatum	0.000362686	1	91.16	0.000143	0.000275	0.000542	0	0.000303	7.32e-05	0.000454	0.000473	0.000132	0.000697	0.000401	0.000839	0.000644	0.000343	0.000158	0.000253	0.00041	0.000252	0.000416	0	0.000166	6.06e-05	0	4.39e-05	0.000107	0.000312	0	4.08e-05	0.00131	0	0	0.00014	0.000166	9.13e-05	0.00169	0.000127	0.000471	0.0012	0	0.00165	0.000575
Firmicutes	Clostridia	Clostridiales	Lachnospiraceae	Anaerostipes	Anaerostipes hadrus	0.000349052	3	99.6967	0	1.2e-05	1.94e-05	0.001936	4.736e-05	7.32e-06	7.57e-06	0	0	3.355e-05	5.01e-05	0.001613	0	0.002399	0.000634	0	4.1e-05	0.0012925	0	0	0	0	0.000225	0	0	4.45e-05	0.0028623	0.0007738	1.822e-05	0.000411	0	0	9.35e-06	9.13e-06	8.12e-05	0	0	0.000635	0	0.0014979	0
Firmicutes	Clostridia	Clostridiales	Oscillospiraceae	Oscillibacter	Oscillibacter ruminantium	0.000317115	1	92.99	0	0	0	0.00147	0	0	0	0	0	0	0	0.00381	0	0	0	0	0	0	0	0	4.15e-05	0	0	0.000877	0	0	0	0	0	0.000898	0	0	2.34e-06	0	0	0	0	0	0	0.00622	0
Firmicutes	Clostridia	Clostridiales	Ruminococcaceae	Phocea	Phocea massiliensis	0.00028057	2	95.135	0.0003216	3.59e-05	0.000329	0	0.000246	8.78e-05	0.000363	0.0006818	0.000132	0.0004691	0.00015	0.000194	0.000362	0.000182	0.000238	0.000362	0.000144	0.000318	0.0005013	0.000186	0.000415	0.000364	0	0.000219	0.000215	0.0002	0.000415	0.000163	0.000447	0.000224	0	0	0.000215	0.00023713	0.000447	0.000635	0.0002983	0.000106	0.000273	0.000339	0.001151
Firmicutes	Clostridia	Clostridiales	-	Intestinimonas	Intestinimonas butyriciproducens	0.000270207	1	91.87	3.58e-05	0.000383	5.81e-05	0.000443	8.52e-05	9.51e-05	0.000462	0.000264	0.00033	0.000593	0.000602	0.000387	8.05e-05	0.000141	7.92e-05	0.000217	0.000123	0.000265	0.000256	0.000279	0.000498	0.000212	0.00045	0.000219	0	0.000534	0.000185	0.000122	0.000456	0.000524	0.000369	0.000252	0.000264	5.48e-05	0.000142	0	0.000248	0.000388	0.000223	0.000102	0.000575
Firmicutes	Clostridia	Clostridiales	Ruminococcaceae	Ruminococcus	Ruminococcus faecis	0.000261572	1	100	0.00276	0	5.81e-05	3.69e-05	0	1.46e-05	0	6.96e-05	0	1.34e-05	0	0	0	0	0	0	2.05e-05	0	0	0	0	0.00291	0	0	0	4.45e-05	0	0.00298	9.11e-06	0	0	0	1.17e-05	0	0.00128	0	4.96e-05	0	0	0.000728	0
Firmicutes	Clostridia	Clostridiales	Lachnospiraceae	-	[Eubacterium] rectale	0.000235481	1	100	0.000286	0.00018	0.000135	0.000259	0.000426	0.000205	0.000151	0.000181	0	0.00059	0.000451	0	0	0.000121	0.000158	3.62e-05	0.000533	0.000205	0.000234	0	0	0.000212	0	0	0.000322	0.000423	0	0.000408	0.00031	0.000112	0.000369	0.00014	0.000393	7.3e-05	0.000345	0.000381	0.000124	0	0.00062	0.000262	0.00101
Firmicutes	Clostridia	Clostridiales	Lachnospiraceae	Fusicatenibacter	Fusicatenibacter saccharivorans	0.00018391	1	97.5	0	0	0	0	0	0	0.000129	0	0	1.01e-05	2.51e-05	0	0	0	0	0	0	0	0	0	0	0	0.0018	0	0	0	0	0	0	0	0	0	0	0	0	0	0.00576	0	0	0	0
Bacteroidetes	Bacteroidia	Bacteroidales	Bacteroidaceae	Bacteroides	Bacteroides cellulosilyticus	0.000148198	2	99.24	0.0001074	0	1.94e-05	0.000579	0	0	0	0.0002366	0	0.000352	0	0.000258	0	0.0005048	7.92e-05	0	0	0	6.39e-05	0.000837	0	0	0	0.0001316	0.000645	6.68e-05	0.000738	0.0002445	0.000884	0	0	0	6.31e-05	0	0	0	0.0001489	0.000141	0.0001241	0	0
Firmicutes	Clostridia	Clostridiales	Ruminococcaceae	Negativibacillus	Negativibacillus massiliensis	0.00013661	4	93.535	0	0	0	0.000936	0	0	0	0	0	0.0021704	0	0.00129	0	0	0.000317	0	0	0.00039743	0	0	0	0	0	4.39e-05	0	0	0.000323	0	0	0	0	0	0	0	6.09e-05	0	0.000199	0	0	0	0
Firmicutes	Clostridia	Clostridiales	Ruminococcaceae	Faecalibacterium	Faecalibacterium prausnitzii	0.000132707	5	99.318	0.0004294	4.79e-05	0	0	0.0001324	0.00011702	8.334e-05	8.35e-05	0	0.0001609	0.0001003	0	4.03e-05	2.02e-05	0	0	8.2e-05	0.00034503	0.0010307	9.3e-05	0	0.0001213	0.000899	0	0	0	0	8.16e-05	4.561e-05	7.48e-05	0	0	0.0001427	9.13e-06	0.0001421	0.000127	0.000124	0	7.45e-05	0.00031276	0.000575
Firmicutes	Erysipelotrichia	Erysipelotrichales	Erysipelotrichaceae	Erysipelatoclostridium	Erysipelatoclostridium ramosum	0.000117748	2	99.55	0	0	0	0	0	0.0012866	0.0007271	0	0	0	0	0	0	0	0	0	0.000513	0	0	0	0	0.00143	0	0	0	0	0	0	0	0	0	0	0	0.0007665	0	0	0	0	0	0	0.000144
Bacteroidetes	Bacteroidia	Bacteroidales	Barnesiellaceae	Barnesiella	Barnesiella intestinihominis	9.09102e-05	2	99.35	0	2.39e-05	0	1.23e-05	0	0	0	2.78e-05	0	0	0	0	4.03e-05	0.000606	0	0.000109	0.001271	7.29e-05	0	0.000186	0	6.06e-05	0	8.77e-05	0.000215	0	0.0004152	0	4.56e-05	0	0	0	0.00011	9.13e-06	0	0	0	3.53e-05	2.48e-05	0.0004657	0
Bacteroidetes	Bacteroidia	Bacteroidales	Bacteroidaceae	Bacteroides	Bacteroides stercoris	8.92929e-05	2	99.89	7.16e-05	1.2e-05	1.94e-05	4.93e-05	0.000142	5.85e-05	8.33e-05	2.78e-05	6.6e-05	0.0006305	0.0001003	0	0	0.000424	7.92e-05	7.23e-05	8.21e-05	2.65e-05	8.52e-05	0	0	3.03e-05	0	0.000351	0.000107	6.68e-05	0	0.000122	0.000337	3.74e-05	0.000185	0	5.84e-05	4.56e-05	2.03e-05	0	9.92e-05	0	9.93e-05	0.000161	0
Firmicutes	Clostridia	Clostridiales	Ruminococcaceae	Ruminococcus	Ruminococcus bromii	8.36419e-05	2	94.35	0.0001428	3.59e-05	1.94e-05	3.69e-05	0.0001889	3.66e-05	3.03e-05	8.35e-05	0	0.0001575	0.0002001	0	0	0	0.000158	0	0.0001845	9.28e-05	0.0001917	0	0	3.03e-05	0.00045	0	0	0.0001113	0	8.15e-05	7.3e-05	0.0001496	0	8.41e-05	0.0001099	3.65e-05	0.0001626	0.000127	0.000174	0	7.44e-05	6.766e-05	0.000144
Firmicutes	Clostridia	Clostridiales	Lachnospiraceae	Lachnoclostridium	[Clostridium] polysaccharolyticum	7.27167e-05	1	95.46	0	0	0	0	0	0	0	0	0	0	0	0.000323	4.03e-05	0	0.000317	0.000326	0.000103	0.000133	0	9.3e-05	0	0.000303	0	0.000219	0.000215	0.000245	9.23e-05	0.000204	0	7.48e-05	0	0	0	0	0	0	0.000298	0	0	6.77e-05	0
Proteobacteria	Gammaproteobacteria	Enterobacterales	Enterobacteriaceae	Shigella	Shigella dysenteriae	7.02052e-05	6	93.87	0.0001074	2.39e-05	1.94e-05	9.84e-05	7.572e-05	5.116e-05	4.547e-05	8.34e-05	0.000132	2.345e-05	0	0	4.03e-05	6.06e-05	0	0.0001447	0.0001025	5.966e-05	4.26e-05	0	0	0.0001213	0	8.78e-05	0	2.23e-05	0	0.0001224	0.00013671	7.48e-05	0.000554	5.61e-05	8.646e-05	4.573e-05	4.06e-05	0	7.44e-05	7.06e-05	4.96e-05	3.386e-05	0.000144
Bacteroidetes	Bacteroidia	Bacteroidales	Bacteroidaceae	Bacteroides	Bacteroides nordii	6.3781e-05	1	100	0	0	5.81e-05	0	0	0.000176	0	0	6.6e-05	0.000509	0	0	4.03e-05	0.000162	0	0.000109	0	0.000345	0	0.000186	0	0.000152	0	0	0.000215	0	0	0.000163	0	0	0	0.000252	0	0.00011	6.09e-05	0	0	0	7.45e-05	0	0
Firmicutes	Clostridia	Clostridiales	Lachnospiraceae	Coprococcus	Coprococcus catus	6.08217e-05	1	99.55	0	0	0	0	0.000114	0	0	0	0	6.7e-06	0	0	0	0	0	0	2.05e-05	0.000159	0	0	0	0.000879	0	0	0	0	0	0	9.11e-06	0	0	0	0	0	0	0	0	0	0	7.62e-05	0
Firmicutes	Erysipelotrichia	Erysipelotrichales	Erysipelotrichaceae	Turicibacter	Turicibacter sanguinis	5.546e-05	1	100	0.000107	0.00018	0	0	0	7.32e-06	0	0.000195	0	6.7e-06	0	0	4.03e-05	2.02e-05	0	0	0	0.00059	0.000298	0	0	0	0	0	0	0.000245	0	0.000285	6.38e-05	0	0	0	0	0	0	0	0	0	0	0.000135	0
Firmicutes	Clostridia	Clostridiales	Lachnospiraceae	Roseburia	Roseburia faecis	4.33402e-05	2	99.775	7.16e-05	5.99e-05	0	6.16e-05	6.62e-05	1.46e-05	2.27e-05	2.78e-05	0	0.000131	0.0001	0	0	2.02e-05	0	0	0.0001235	1.33e-05	3.2e-05	0	0	3.03e-05	0	0	0	8.9e-05	0	8.15e-05	2.731e-05	3.74e-05	0	0.00014	8.648e-05	1.83e-05	8.12e-05	0.000127	2.48e-05	0	0.0001241	2.54e-05	0.000144
Bacteroidetes	Bacteroidia	Bacteroidales	Rikenellaceae	Alistipes	Alistipes timonensis	3.90643e-05	1	100	0	0	1.94e-05	1.23e-05	4.73e-05	0	3.03e-05	0	0	3.02e-05	5.01e-05	0	0	0	7.92e-05	0.000109	0.000164	5.3e-05	3.2e-05	0	0	3.03e-05	0.00045	0	0	2.23e-05	0	8.15e-05	4.56e-05	0	0	0	3.04e-05	0	0	0	0	3.53e-05	4.96e-05	3.39e-05	0
Firmicutes	Clostridia	Clostridiales	Ruminococcaceae	Ethanoligenens	Ethanoligenens harbinense	3.23764e-05	1	92.12	0	0	0	0	0.00129	0	0	0	0	0	0	0	0	2.02e-05	0	0	0	0	4.26e-05	0	0	0	0	0	0	0	0	0	0	0	0	0	7.01e-06	0	0	0	0	0	0	0	0
Firmicutes	Clostridia	Clostridiales	Eubacteriaceae	Eubacterium	Eubacterium callanderi	2.94048e-05	1	100	0	0	0	0	0	0	0	0	0	0	0	0.000323	0	0	0	0	0	0.000404	0	0	0	0	0	0	0	0	0	0	0	0	0	0	0	0	0	0	0	0	0	0	0
Firmicutes	Clostridia	Clostridiales	Ruminococcaceae	Anaerotruncus	Anaerotruncus rubiinfantis	2.5804e-05	1	99.32	0	3.59e-05	1.94e-05	0	0	0.000117	0	0	0	2.68e-05	0	6.45e-05	0	0	0	3.62e-05	2.05e-05	1.99e-05	0	0	0	0	0	0	0	0	0.000231	0.000245	9.11e-06	0	0	0	0	0.000128	0.000122	0	0	0	0	8.46e-06	0
Firmicutes	Clostridia	Clostridiales	Eubacteriaceae	Eubacterium	[Eubacterium] hallii	2.39507e-05	1	99.09	0	0	3.87e-05	0	0	0	7.57e-06	1.39e-05	0	2.01e-05	5.01e-05	0	4.03e-05	0.000707	0	0	0	0	2.13e-05	0	0	0	0	0	0	0	0	4.08e-05	0	0	0	0	3.74e-05	0	2.03e-05	0	0	0	0	8.46e-06	0
Firmicutes	Clostridia	Clostridiales	Clostridiaceae	Caloramator	Caloramator fervidus	2.12774e-05	1	88.31	0	5.99e-05	0	2.46e-05	9.46e-06	7.32e-06	7.57e-06	4.18e-05	6.6e-05	0	0	6.45e-05	0	0	0	0	6.16e-05	1.99e-05	0.00016	0	0	0	0	4.39e-05	0	6.68e-05	0	0	3.65e-05	0	0	0	1.64e-05	1.83e-05	2.03e-05	0	0	0	2.48e-05	0	0.000144
Bacteroidetes	Bacteroidia	Bacteroidales	Muribaculaceae	Muribaculum	Muribaculum intestinale	1.37914e-05	1	92.61	0	0	0	0	0	0	0	2.78e-05	6.6e-05	0	0	0	0	0	0	0	0	0	0	0	0	0	0.000225	4.39e-05	0.000107	2.23e-05	0	0	0	0	0	0	2.34e-06	0	0	0	2.48e-05	3.53e-05	2.48e-05	0	0
Firmicutes	Erysipelotrichia	Erysipelotrichales	Erysipelotrichaceae	Erysipelatoclostridium	[Clostridium] spiroforme	1.05476e-05	1	100	0	0	0	0	0	0	0	0	0	0	0	0	0.000443	0	0	0	0	0	0	0	0	0	0	0	0	0	0	0	0	0	0	0	0	0	0	0	0	0	0	0	0
Bacteroidetes	Bacteroidia	Bacteroidales	Rikenellaceae	Alistipes	Alistipes finegoldii	1.0485e-05	1	100	0	0	0	1.23e-05	0	2.19e-05	7.57e-06	4.18e-05	0	6.7e-06	0	0	0	2.02e-05	7.92e-05	3.62e-05	8.21e-05	0	0	0	0	0	0	0	0	4.45e-05	0	0	1.82e-05	0	0	2.8e-05	0	0	0	0	2.48e-05	0	0	1.69e-05	0
Chlamydiae	Chlamydiia	Parachlamydiales	Simkaniaceae	Simkania	Simkania negevensis	1.00112e-05	1	100	0	0	1.94e-05	2.46e-05	1.89e-05	2.19e-05	7.57e-06	1.39e-05	0	6.7e-06	2.51e-05	0	0	0	0	0	2.05e-05	0	3.2e-05	0	0	0	0	0	0	0	0	0	1.82e-05	0	0	0	2.57e-05	0	2.03e-05	0	0	7.06e-05	0	1.69e-05	0
Firmicutes	Erysipelotrichia	Erysipelotrichales	Erysipelotrichaceae	Holdemania	Holdemania filiformis	9.43095e-06	1	100	0	0	0	1.23e-05	0	0.000146	0	0	0	1.68e-05	0	0	0	0	0	0	0	0	3.2e-05	9.3e-05	0	0	0	0	0	0	0	0	0	0	0	0	3.51e-05	0	6.09e-05	0	0	0	0	0	0
Thermotogae	Thermotogae	Kosmotogales	Kosmotogaceae	Mesotoga	Mesotoga infera	8.85976e-06	1	78.95	0	0	0	1.23e-05	0	2.19e-05	0	1.39e-05	0	6.7e-06	0	0	0	0	0	0	4.1e-05	0	0	0.000186	0	0	0	0	0	0	0	0	9.11e-06	0	0	0	0	0	8.12e-05	0	0	0	0	0	0
Firmicutes	Clostridia	Clostridiales	Ruminococcaceae	Ruminiclostridium	[Eubacterium] siraeum	8.1481e-06	1	99.09	0	2.39e-05	1.94e-05	0	9.46e-06	0	0	0	0	2.68e-05	0	0	0	0	0	0	4.1e-05	6.63e-06	0	0	0	0	0	0	0	0	0	0	1.82e-05	0	0	0	2.57e-05	9.13e-06	8.12e-05	0	2.48e-05	0	0	1.69e-05	0
Firmicutes	Clostridia	Clostridiales	Lachnospiraceae	Blautia	Blautia obeum	7.66e-06	1	99.54	0	1.2e-05	0	0	0	7.32e-06	2.27e-05	0	0	6.7e-06	0	0	0	0	0	0	0	1.33e-05	0	0	0	3.03e-05	0	0	0.000107	0	0	0	1.82e-05	0	0	0	1.4e-05	0	4.06e-05	0	0	0	4.96e-05	0	0
Firmicutes	Clostridia	Clostridiales	Lachnospiraceae	Blautia	Blautia wexlerae	7.62143e-06	1	99.55	0	0	5.81e-05	0	0	0	0	0	0	0	0	0	0	0	0	0	0	0	0	0	0	0	0	0	0	0	0	0	0	0.000262	0	0	0	0	0	0	0	0	0	0	0
Planctomycetes	Planctomycetia	Planctomycetales	Gemmataceae	Gemmata	Gemmata massiliana	7.28024e-06	1	95.65	0	1.2e-05	0	3.69e-05	0	7.32e-06	1.51e-05	0	0	1.34e-05	0	0	0	2.02e-05	0	0	4.1e-05	1.33e-05	0	0	0	0	0	0	0	0	0	4.08e-05	1.82e-05	0	0	0	9.35e-06	0	0	0	0	0	0	0	0
Actinobacteria	Actinobacteria	Bifidobacteriales	Bifidobacteriaceae	Bifidobacterium	Bifidobacterium breve	6.705e-06	1	87.74	0	0	0	0	9.46e-06	0	0	0	6.6e-05	6.7e-06	0	6.45e-05	0	0	0	0	2.05e-05	0	0	0	0	0	0	0	0	0	0	0	9.11e-06	0	0	0	2.34e-06	0	0	0	2.48e-05	0	0	0	0
Bacteroidetes	Bacteroidia	Bacteroidales	Rikenellaceae	Alistipes	Alistipes putredinis	6.18595e-06	1	100	0	0	0	0	0	0	1.51e-05	2.78e-05	0	6.7e-06	0	0	0	0	0	0	2.05e-05	1.33e-05	2.13e-05	0	0	0	0	0	0	6.68e-05	0	0	0	0	0	0	4.68e-06	9.13e-06	0	0	0	0	7.45e-05	0	0
Firmicutes	Tissierellia	Tissierellales	Peptoniphilaceae	Peptoniphilus	Peptoniphilus tyrrelliae	5.06857e-06	2	94.495	3.58e-05	3.59e-05	0	1.23e-05	1.892e-05	0	0	5.56e-05	0	1.345e-05	0	0	0	0	0	0	0	1.99e-05	0	0	0	0	0	0	0	0	0	0	0	0	0	0	2.101e-05	0	0	0	0	0	0	0	0
Actinobacteria	Coriobacteriia	Eggerthellales	Eggerthellaceae	Slackia	Slackia isoflavoniconvertens	4.5119e-06	1	100	0	0	0	0	0	0	0	0	0	1.01e-05	0	0	4.03e-05	0	0	0	0	1.33e-05	2.13e-05	0	0	6.06e-05	0	4.39e-05	0	0	0	0	0	0	0	0	0	0	0	0	0	0	0	0	0
Bacteroidetes	Bacteroidia	Bacteroidales	Bacteroidaceae	Bacteroides	Bacteroides stercorirosoris	3.10024e-06	1	97.83	0	1.2e-05	0	0	1.89e-05	0	0	0	0	0	0	0	0	0	0	0	0	0	0	0	0	0	0	0	0	0	0	8.15e-05	0	0	0	0	9.35e-06	0	0	0	0	0	0	8.46e-06	0
Bacteroidetes	Bacteroidia	Bacteroidales	Rikenellaceae	Alistipes	Alistipes onderdonkii	2.16833e-06	1	100	0	1.2e-05	0	0	9.46e-06	0	1.51e-05	0	0	6.7e-06	0	0	0	0	0	0	2.05e-05	0	0	0	0	0	0	0	0	0	0	0	0	0	0	0	7.01e-06	0	2.03e-05	0	0	0	0	0	0
Bacteroidetes	Bacteroidia	Bacteroidales	Rikenellaceae	Alistipes	Alistipes shahii	2.12476e-06	1	100	0	0	0	1.23e-05	9.46e-06	0	0	0	0	6.7e-06	0	0	0	0	0	0	2.05e-05	1.33e-05	0	0	0	0	0	0	0	2.23e-05	0	0	0	0	0	0	4.68e-06	0	0	0	0	0	0	0	0
[truncated: 1 more columns]

## Sheet: 2B
Table S2B. Mapping of in vitro experimental phylotypes to reference collection and calculation of their binary phenotype profiles.
Mapping to Reference Collection			B vitamin prototrophy (Predicted Phenotype Index)3								Averaged relative abundance (%) (all in vitro samples)
Phylotype (Species)	Mapping level1	Genomes2	B1	B2	B3	B5	B6	B7	B9	B12
Bacteroides thetaiotaomicron	S	3	1	1	1	1	1	1	1	0	29.3965
Escherichia fergusonii	S	5	1	1	1	1	1	1	1	0	18.8527
Clostridium perfringens	S	4	1	1	1	0	0	0	1	1	6.04771
Flavonifractor plautii	S	3	0	0	0	0	0	0	0	1	5.4638
Peptoniphilus grossensis	S	2	0	1	0.5	0	0	0	1	0	4.38375
Akkermansia muciniphila	S	4	1	1	1	1	1	1	1	0.25	4.21303
Bacteroides faecis	S	2	1	1	1	1	1	1	1	0	3.86528
Bacteroides caccae	S	3	1	1	1	1	1	1	1	0	3.06832
Bacteroides vulgatus	S	6	1	1	1	1	1	1	1	1	2.78771
Pseudoflavonifractor phocaeensis	G	3	0	0.5	0	0	0	0	0	0.5	2.46542
Finegoldia magna	S	6	1	0	0	0	1	0	1	0	2.12389
Bacteroides uniformis	S	7	1	1	1	1	1	1	1	1	1.68544
Flintibacter butyricus	S1	3	0	0	0	0	0	0	0	1	1.5943
Phascolarctobacterium faecium	G	1	1	1	0	1	1	1	1	1	1.33587
Parabacteroides merdae	S	4	1	1	1	1	1	1	1	1	1.16286
Bacteroides massiliensis	S	1	1	1	1	1	1	1	1	0	0.964124
Bacteroides ovatus	S	7	1	1	1	1	1	1	1	0	0.760815
Agathobaculum desmolans	S	1	0	0	0	0	0	0	0	1	0.610591
Pseudoflavonifractor capillosus	S	1	0	0	0	0	0	0	0	1	0.596201
Eggerthella lenta	S	3	1	0	0	0.67	1	0	1	0	0.469723
Parabacteroides distasonis	S	4	1	1	1	1	1	1	1	1	0.466972
Dorea formicigenerans	S	3	1	1	1	0	1	0	1	1	0.430986
Bacteroides dorei	S	5	1	1	1	1	1	1	1	1	0.375756
Hungatella hathewayi	S	4	0	0	0	0	0	0.5	0	1	0.371252
Paeniclostridium sordellii	S	2	0	1	0	1	0	1	1	1	0.36124
Peptoniphilus phoceensis	G	9	0	1	0.64	0.14	0.14	0.57	0.86	0	0.334213
Peptoniphilus gorbachii	S	1	0	1	1	0	0	1	1	0	0.317841
Clostridium subterminale	G	45	0.61	0.87	0.68	0.61	0.65	0.28	0.9	0.62	0.312065
Anaerotignum lactatifermentans	S	1	1	1	0	1	0	1	0	0	0.307889
Parabacteroides goldsteinii	S	3	1	1	1	1	1	1	1	1	0.284933
Bacteroides xylanisolvens	S	4	1	1	1	1	1	1	1	0.25	0.270064
Neglecta timonensis	S	1	0	0	0	0	1	0	1	0	0.261302
[Ruminococcus] gnavus	S	4	0	0	1	0.5	1	0	0	1	0.251175
Clostridium paraputrificum	S	1	1	0	0	0	0	0	1	0	0.242833
Bacteroides caecimuris	S	2	1	1	1	1	1	1	1	0	0.235128
Enterococcus faecalis	S	62	0	0	0	0.56	0	0	0.98	0	0.207321
Catabacter hongkongensis	-	-									0.199452
Dorea longicatena	S	2	1	1	1	0	1	0	1	1	0.172548
Dielma fastidiosa	S	1	0	0	0	0	0	0	0	0	0.156691
Bacteroides salyersiae	S	2	1	1	1	1	1	1	1	0	0.148057
Clostridium saudiense	S	1	0	1	1	1	0	0	1	0	0.143407
Collinsella aerofaciens	S	2	0	0	1	0	1	0	1	0.5	0.128823
Anaerotruncus colihominis	S	1	0	0	0	0	0	0	0	1	0.12571
Hydrogenoanaerobacterium saccharovorans	F	41	0.3	0.36	0.53	0.23	0.37	0.18	0.43	0.6	0.115295
Coprobacillus cateniformis	S	1	0	1	0	0	0	0	0	0	0.111215
Clostridium tertium	S	1	0	0	0	0	1	0	1	0	0.102429
Peptoniphilus coxii	G	9	0	1	0.64	0.14	0.14	0.57	0.86	0	0.102098
Lachnoclostridium pacaense	G	32	0.29	0.57	0.5	0	0.07	0.14	0.22	1	0.101938
Bacteroides faecichinchillae	S	2	1	1	1	1	1	1	1	0	0.0999811
[Clostridium] hylemonae	S	1	0	0	1	0	0	0	0	1	0.0952381
Gemmiger formicilis	S	1	0	0	1	1	0	0	0	0	0.0872897
Anaerofilum pentosovorans	S	1	0	0	0	0	0	0	0	1	0.0623676
[Clostridium] scindens	S	1	1	0	1	0	0	0	1	1	0.0553632
[Eubacterium] tenue	G	2	0	1	0	1	0	1	1	1	0.0469892
Ruminococcus lactaris	S	1	1	0	1	0	1	0	1	1	0.0370044
Acetanaerobacterium elongatum	F	41	0.3	0.36	0.53	0.23	0.37	0.18	0.43	0.6	0.0362686
Anaerostipes hadrus	S	3	1	1	1	1	1	0	1	0	0.0349052
Oscillibacter ruminantium	S	1	0	1	0	0	0	1	0	0	0.0317115
Phocea massiliensis	S	1	0	0	0	0	0	0	0	1	0.028057
Intestinimonas butyriciproducens	S	3	0	0	0	0	0	0	0	1	0.0270207
Ruminococcus faecis	S	1	1	0	1	0	1	0	1	1	0.0261572
[Eubacterium] rectale	S	3	1	1	1	1	1	0	0	1	0.0235481
Fusicatenibacter saccharivorans	S	1	0	0	1	0	1	0	0	1	0.018391
Bacteroides cellulosilyticus	S	3	1	1	1	1	1	1	1	1	0.0148198
Negativibacillus massiliensis	S	1	0	0	0	0	0	0	0	0	0.013661
Faecalibacterium prausnitzii	S	6	0	0.67	0	0	0	0	0	1	0.0132707
Erysipelatoclostridium ramosum	S	2	0	0	1	0	0	0	0	0	0.0117748
Barnesiella intestinihominis	S	1	1	1	1	1	1	1	1	0	0.00909102
Bacteroides stercoris	S	2	1	1	1	1	1	1	1	1	0.00892929
Ruminococcus bromii	S	1	0	0	1	0	0	0	0	0	0.00836419
[Clostridium] polysaccharolyticum	G	32	0.29	0.57	0.5	0	0.07	0.14	0.22	1	0.00727167
Shigella dysenteriae	S	3	1	1	1	1	1	1	1	0	0.00702052
Bacteroides nordii	S	1	1	1	1	1	1	1	1	0	0.0063781
Coprococcus catus	S	1	0	1	1	0	0	0	1	1	0.00608217
Turicibacter sanguinis	S	1	0	0	0	0	1	0	1	0	0.005546
Roseburia faecis	S	2	1	1	1	1	1	0	0	1	0.00433402
Alistipes timonensis	S	2	0	1	1	1	1	0	1	0	0.00390643
Ethanoligenens harbinense	F	41	0.3	0.36	0.53	0.23	0.37	0.18	0.43	0.6	0.00323764
Eubacterium callanderi	S	2	1	1	1	0	1	0	1	1	0.00294048
Anaerotruncus rubiinfantis	S	1	0	0	0	0	0	0	0	1	0.0025804
[Eubacterium] hallii	S	1	1	1	1	1	1	0	1	1	0.00239507
Caloramator fervidus	G	4	0.25	0.5	1	0.75	1	0	1	0.75	0.00212774
Muribaculum intestinale	S	1	1	1	1	1	1	1	1	0	0.00137914
[Clostridium] spiroforme	S	1	0	0	1	0	0	0	0	0	0.00105476
Alistipes finegoldii	S	1	0	1	1	1	1	0	1	0	0.0010485
Holdemania filiformis	S	1	0	0	0	0	0	0	0	0	0.000943095
[Eubacterium] siraeum	S	3	0	0	1	0	1	0	0	0	0.00081481
Blautia obeum	S	3	1	0.67	1	0	0	0.67	1	1	0.000766
Blautia wexlerae	S	3	1	1	1	0	0	0.67	1	1	0.000762143
Bifidobacterium breve	S	24	1	0	1	0	1	0	1	0	0.0006705
Alistipes putredinis	S	1	0	1	1	1	1	0	1	0	0.000618595
Peptoniphilus tyrrelliae	G	9	0	1	0.64	0.14	0.14	0.57	0.86	0	0.000506857
Slackia isoflavoniconvertens	G	2	0	0	0.5	0	1	0	1	0	0.00045119
Bacteroides stercorirosoris	S	1	1	1	1	1	1	1	1	0	0.000310024
Alistipes onderdonkii	S	1	0	1	1	1	1	0	1	0	0.000216833
Alistipes shahii	S	1	0	1	1	1	1	0	1	0	0.000212476
Simkania negevensis	-	-									0.00100112
Mesotoga infera	-	-									0.000885976
Gemmata massiliana	-	-									0.000728024
Total # of mapped phylotypes	95										0.997886
- mapped at the level of species (S)	81										0.948968
- mapped at the level of genus (G)	11										0.0474082
- mapped at the level of family (F)	3										0.00150981
Total # of unmapped phylotypes	4										0.00211374

## Sheet: 2C
Table S2C: Abundance of multi-auxotrophs in extreme media in vitro.
		B vitamin prototrophy								Multi-auxotrophy		Relative abundance in [B1,B2,B5,B7] defficient diets																		Relative abundance in [B1,B2,B5,B7] excessive diets																			Average abundance
#	Phylotype (Species)	B1	B2	B5	B7	B3	B6	B9	B12	Aux category	Aux Score on [B1,B2,B5,B7]	AD1	AD2	AD3	AD4	AD5	AD6	4D4N1	4D4N2	4D4N3	4D4N4	4D4N5	4D4N6	7D1N1	7D1N2	7D1N3	7D1N4	7D1N5	7D1N6	AE1	AE2	AE3	AE4	AE5	AE6	4E4N1	4E4N2	4E4N3	4E4N4	4E4N5	4E4N6	7E1N1	7E1N2	7E1N3	7E1N4	7E1N5	7E1N6		Average
1	Flavonifractor plautii	0	0	0	0	0	0	0	1	B1, B2, B5, B7	4	0.0453828	0.0522078	0.0616456	0.0575698	0.0727281	0.0650695	0.0614597	0.02093	0.0715335	0.0615455	0.035394	0.0623204	0.030339	0.0641763	0.0443717	0.0623596	0.074895	0.093298	0.0526191	0.0420792	0.045707	0.0420266	0.0723236	0.0115545	0.030956	0.0415801	0.082627	0.014973	0.0562691	0.0369942	0.0178151	0.0545532	0.0421133	0.0748102	0.083452	0.0410945		0.0576237
2	Pseudoflavonifractor phocaeensis	0	0.5	0	0	0	0	0	0.5	B1, B2, B5, B7	4	0.022549	0.0010169	0.0038357	1.23e-05	0.0050389	0.042022	0.0420819	0	0.0531955	0.031915	0.03719	0.014868	0	5.6e-05	0.028697	0.00384033	0.0526396	0	0.0750303	0.0057932	0.043172	0.030269	0.031005	0.017257	0.030849	0.0418263	9.23e-05	0.010478	0.0121827	0.009206	0.06275	0.0419736	0.0425035	0.0864159	0.085468	0.001055		0.018831
3	Flintibacter butyricus	0	0	0	0	0	0	0	1	B1, B2, B5, B7	4	0	0	0.12354	0	0.12257	7.32e-06	0	0	0.000166	0	0.000225	0.08202	0.000185	0	1.4e-05	9.13e-06	0	0	4.03e-05	0.13345	0	0.010326	0.000267	0.0018465	0	0.030467	0	0	9.11e-06	0	2.48e-05	0	0.10283	0.05132	0	0		0.0182631
4	Agathobaculum desmolans	0	0	0	0	0	0	0	1	B1, B2, B5, B7	4	0	0.0202869	0.000368	0.020234	3.79e-05	0.0304313	4.26e-05	0	0.0034845	0.000576	0.00045	0.030395	0.020369	5.61e-05	0.00032268	0.000411	0.0001423	0.000889	0.0006035	0.000384	7.92e-05	0.000181	0.0001026	0.0025031	0.00118	0.000557	9.23e-05	4.08e-05	0.0407111	7.48e-05	0.000521	0	0.000174	4.23e-05	0.00834	3.91e-05		0.00713868
5	Pseudoflavonifractor capillosus	0	0	0	0	0	0	0	1	B1, B2, B5, B7	4	0	0	0	0	0	0	0	0.070093	0	0	0	0.03	0	0	0	0	0	0	0	0	0	0.0400723	0.0200205	0	0	0	0.03	0	0.0500365	0	0	0	0	0	0	0		0.00556072
6	Neglecta timonensis	0	0	0	0	0	1	1	0	B1, B2, B5, B7	4	0.0024	0.00305	7.74e-05	0.00016	0	3.66e-05	0.0089507	0	0.0100415	0	0.01	0	0.00443	2.8e-05	0.00359468	0.00163	0.00414	0.000508	0.00165	6.06e-05	0.000158	0.000326	8.21e-05	1.99e-05	0.000107	0.000289	0.030185	0	0.00323	0.000449	0.00859	0.000388	0.000496	0.000279	0.00619	7.82e-05		0.00272483
7	Dielma fastidiosa	0	0	0	0	0	0	0	0	B1, B2, B5, B7	4	0	3.59e-05	0	0	0.00529	0	0	0	0	0	0	0	0.01	0	0	9.13e-06	0.03	0	0	0	0.000475	0	0	0	0	0	0	0	0	0	0	0	0	0	0	0		0.00088765
8	Collinsella aerofaciens	0	0	0	0	1	1	1	0.5	B1, B2, B5, B7	4	0.000501	0.000108	0.000851	0.000862	0.00117	6.58e-05	0.000821	9.3e-05	0.00154	0.00315	0.00045	0.00184	0	0	0.0014	0.00143	0.000122	0.00127	0.00451	0.00311	0.0023	0.00365	0.00127	0.00136	0.0014	0.00118	0.000323	0.00183	0.000319	0.00284	0.00134	0.00611	0.00107	0.000948	0	0.00207		0.000870767
9	Anaerotruncus colihominis	0	0	0	0	0	0	0	1	B1, B2, B5, B7	4	0.000895	0.0012093	7.76e-05	0.0002828	0	5.854e-05	0.0053017	0.000186	0.003358	0.0001212	0.004275	8.77e-05	0.002586	0	0.00155497	0.00106808	0.0023759	0.000127	0.0015328	0.000363	0	0.0001812	8.2e-05	0	0.000214	0.0002005	0.0078482	0	0.002305	0.0003736	0.0049403	0.0002824	0.0001736	0.00097336	0.003168	0		0.00130915
10	Clostridium tertium	0	0	0	0	0	1	1	0	B1, B2, B5, B7	4	0	0	0	0	0	0	0	0	0	0	0	0.01	0	0.01	0	0	0	0.00673	0	0	0	0	0.01	0	0	0	0	0	0	0	0	0	0	0	0	0.00629		0.001485
11	Anaerofilum pentosovorans	0	0	0	0	0	0	0	1	B1, B2, B5, B7	4	0.000358	0.000108	0.0004834	0.0006776	0.000104	0.00021232	0.0004267	0.000186	0.000498	0.000243	0.00112	0.000439	0.00129	8.41e-05	0.0001967	0.000137	8.12e-05	0	0.00109	0.000464	0.000158	0.000217	0.000164	0.000152	0.000322	0.0006675	0.000646	0.000897	0.00041011	0.000823	0.000223	0.00053	0.000521	0.00037246	0.009348	3.91e-05		0.000369168
12	Peptoniphilus grossensis	0	1	0	0	0.5	0	1	0	B1, B2, B3	3	0.163794	0.16457	0.0102321	0.0821315	0.0306441	0.0514415	0.0410864	0.020465	0.0101655	0.061757	0.05157	0.0060967	0.224244	0.020672	0.0717465	0.0411236	0.0307312	0.009647	0.0620543	0.000202	0.030793	0.0105072	0.00181	0.0309681	0.050966	0.0057835	0.0003693	0.0083158	0.00224611	0.0081174	0.0208942	0.0411306	0.0093283	0.00119692	0.021151	0.0413291		0.0606732
13	Hungatella hathewayi	0	0	0	0.5	0	0	0	1	B1, B2, B5	3	0	0	1.94e-05	0	0	0	0	0	0	0	0	0	0.02	0	0	0	0	0	0	4.04e-05	0.03	0	0	0	0.00387	0	0.02	0	0	0	0.04	0.00198	0	8.46e-06	0	0		0.00111219
14	[Ruminococcus] gnavus	0	0	0.5	0	1	1	0	1	B1, B2, B7	3	0	3.59e-05	0	0.0075046	0.0100495	0.0276866	0	0	0	0	0.000225	0	0	0	0	0.000731	0	0	0	0	0.0042	0.001411	0	0.0138098	0.005907	0.001736	0	0.00106	0	0.000936	0	0.0058353	0.00464	0	0	0.00246		0.00256848
15	Enterococcus faecalis	0	0	0.56	0	0	0	0.98	0	B1, B2, B7	3	0	1.2e-05	1.94e-05	0	2.84e-05	0	6.39e-05	0	0	0	0	0	0	0	2.1e-05	0	0	0	0	0	0.00943	0.000181	0.00743	0	0	0.0018	0	0	0.03	0	0	0.000353	0	0	0.00331	0		8.03889e-06
16	Coprobacillus cateniformis	0	1	0	0	0	0	0	0	B1, B2, B7	3	0.000537	0.000156	0.00333	0.000222	0.000265	6.58e-05	0.000884	0	0.000913	6.06e-05	0.00157	0.000132	0	0	0.000655	0.00042	0	0.000127	0.00177	0.000182	0.00119	0.00177	0.00105	0.000398	0	0.00276	0.000185	8.15e-05	0.000137	0.00168	0.000174	0.00145	0.000223	6.77e-05	0.00129	0.000313		0.000518744
17	Gemmiger formicilis	0	0	1	0	1	0	0	0	B1, B2, B7	3	0.0014316	0.0002629	0.0005804	0.0018385	0.00024626	0.0004463	0.0045166	0.000186	0.001867	0.0003946	0.00247	8.77e-05	0	0.000252	0.0017265	0.00050256	0.000569	0	0.000201	0.0006662	0.000317	0.0003253	0.000738	0.0002921	0.000215	0.0001558	0.00434	0.000611	0.00133671	0.0010098	0.0001984	7.06e-05	9.93e-05	0.00058436	0.00216	0.0001951		0.00096544
18	Finegoldia magna	1	0	0	0	0	1	1	0	B2, B5, B7	3	0.010572	0.0081088	0.0023775	0.05415	0.000568	0.0615963	0.063093	0.000744	0.050705	0.0093723	0.020675	0.010438	0.033135	0.032214	0.00083034	0.0072022	0.000589	0.000381	0.021614	0.0079808	0.0100792	0.0019162	0.0022205	0.00080863	0.00301	0.020557	0.0102773	0.000367	0.04051	0.0201494	0.0026548	0.020742	0.0202735	0.00258	0.030144	0.010625		0.0203751
19	Clostridium paraputrificum	1	0	0	0	0	0	1	0	B2, B5, B7	3	0	0.00169	0.00544	0	0	0.00956	0	0	0	0.00152	0	0.00399	0.00332	0.00465	0	9.13e-06	0.00363	0	0	0	0	0	0	0	0	0.02	0	0	0	0	0	0.00297	0	0	0.04	0		0.00187828
20	Peptoniphilus phoceensis	0	1	0.14	0.57	0.64	0.14	0.86	0	B1, B5	2	0.0003218	0.0003829	0	0.0010103	9.46e-06	0.00259932	5.33e-05	0.02298	0	0.000455	0	0	0.00148	0.045604	0.0027214	5.48e-05	2.03e-05	0.000127	0.000161	0	0	3.62e-05	0	0.0001259	0.000107	0	0	0	0.0004195	0.0049364	0	0.000106	4.96e-05	0	0	3.91e-05		0.00432331
21	Peptoniphilus gorbachii	0	1	0	1	1	0	1	0	B1, B5	2	0.000107	3.59e-05	0	8.62e-05	0.000208	0.000117	1.07e-05	0.000744	4.15e-05	9.1e-05	0.000225	0	0.000369	8.41e-05	0.000122	0	0	0	8.05e-05	0	0	0	0	1.99e-05	0.000107	0.000134	0.01	0	0.12	3.74e-05	0	0.000177	0	0	0.000144	0.000195		0.000124522
22	Peptoniphilus coxii	0	1	0.14	0.57	0.64	0.14	0.86	0	B1, B5	2	0	8.38e-05	1.94e-05	0	0	0.00157	0.000416	0	0.0012	0	0.0009	8.77e-05	0	0.01	0.00166	0	0.0077109	0	0	0	0.0043592	0	0	6.63e-06	0.000107	6.68e-05	0	0	0.000292	0	2.48e-05	0.0003173	0	0.00158	0.0082	0		0.00131377
23	Eggerthella lenta	1	0	0.67	0	0	1	1	0	B2,B7	2	0.0068058	0.0050659	0.0047824	0.010572	0.016158	0.009117	0.0060282	0.00419	0.0020755	0.002581	0.000899	0.0050029	0.001846	0.004543	0.0029824	0.0035779	0.0024166	0.006477	0.004103	0.0030524	0.000951	0.003035	0.004223	0.0015767	0.000322	0.0044478	0.0087762	0.005462	0.007329	0.004002	0.0023824	0.002544	0.001638	0.0007879	0.005324	0.004061		0.00528448
24	Clostridium perfringens	1	1	0	0	1	0	1	1	B5, B7	2	0.0809768	1.2e-05	0.0584058	0.0039917	0.071892	2.92e-05	3.2e-05	0.068931	0.009995	0.117975	0	0.0013555	0.000554	5.6e-05	0.116998	0.127785	0.0563193	0.082947	0.0581811	0.157201	0.083801	0.16042	0.069604	0.138585	0.243117	0.103535	0.0704747	0.0651331	0	0.0707722	0.0801596	0.0432403	0.055978	0.07491	0.000288	0.116218		0.0443475
25	Dorea formicigenerans	1	1	0	0	1	1	1	1	B5, B7	2	0	0.031149	1.94e-05	0	0	0	2.13e-05	0	0	0	0	0	0.000185	0	2.34e-06	1.83e-05	0	0	0	0	0	0	0.0044742	0.031021	0	0.021046	0.020276	0	9.11e-06	0.030674	0	0	0	8.46e-06	0	0		0.00174419
26	Dorea longicatena	1	1	0	0	1	1	1	1	B5, B7	2	3.58e-05	0	1.94e-05	8.62e-05	1.89e-05	0	1.07e-05	0.03	0	0	0	0.00132	0	5.61e-05	3.04e-05	0.000128	2.03e-05	0	0	2.02e-05	0	0	0.03	0.00695	0.00129	2.23e-05	0	4.08e-05	1.82e-05	0	0	0	2.48e-05	0.00113	0	0.00109		0.00176254
27	Paeniclostridium sordellii	0	1	1	1	0	0	1	1	B1	1	0	0.000754	0	0.040505	0	0.00070932	0	0	0	6.06e-05	0	0.000439	0	2.8e-05	0	0	0.000122	0	0	0.00293	0.000396	0	0	0.0038364	0.00838	0	0.0030962	0.00758	0.00067422	0	0	0	0	0.00141	0	0		0.00236766
28	[Eubacterium] tenue	0	1	1	1	0	0	1	1	B1	1	0	8.38e-05	0	0.00504	0	1.46e-05	0	0	0	0	0	0	0	0	0	0	2.03e-05	0	0	0.000586	7.92e-05	0	0	0.000219	0.00107	0	0.000877	0.00151	0	0	0	0	0	0.000228	0	0		0.000286594
29	Bacteroides thetaiotaomicron	1	1	1	1	1	1	1	0	B12	NA	0.126796	0.0954677	0.382705	0.327937	0.244353	0.26541	0.234339	0.139762	0.394356	0.391875	0.359564	0.360919	0.235512	0.149106	0.360137	0.40197	0.28476	0.343623	0.370462	0.295714	0.340121	0.349388	0.212722	0.360001	0.309967	0.316831	0.360961	0.422823	0.15053	0.393188	0.37095	0.2979	0.32899	0.392785	0.212946	0.231846		0.240445
30	Escherichia fergusonii	1	1	1	1	1	1	1	0	B12	NA	0.190104	0.171067	0.206338	0.191029	0.258396	0.189967	0.21978	0.251715	0.154072	0.120617	0.188559	0.177633	0.176584	0.22413	0.160807	0.189305	0.187928	0.216162	0.185088	0.0815372	0.205506	0.184089	0.235563	0.0814996	0.102461	0.156639	0.106792	0.125605	0.298232	0.211028	0.185852	0.202885	0.196316	0.0833363	0.273448	0.265144		0.20115
31	Akkermansia muciniphila	1	1	1	1	1	1	1	0.25	B12	NA	0.230668	0.281826	0.0100242	0.0040008	0.00927986	0.0717331	0.0453407	0.000465	0.0420775	0.0110919	0.025168	0.00685	0.117545	0.267992	0.0109884	0.0104389	0.0871889	0.009259	0.013531	0.0247244	0.018779	0.0171972	0.012436	0.0407389	0.037194	0.0089891	0.0464644	0.0574978	0.00306871	0.0225314	0.0455027	0.0126068	0.0309209	0.0401037	0.014027	0.0115224		0.101255
32	Bacteroides faecis	1	1	1	1	1	1	1	0	B12	NA	0.0156242	0.0319887	0.0165765	0.0632078	0.0244011	0.0261083	0.0269622	0.012646	0.035971	0.0561733	0.05855	0.050565	0.008851	0.021082	0.0503813	0.0503268	0.0363703	0.054214	0.0513993	0.060138	0.0546392	0.0177443	0.028193	0.0315406	0.017738	0.0860704	0.0673415	0.052067	0.0121829	0.0546494	0.020772	0.0569186	0.0210121	0.0152436	0.049773	0.018642		0.0296511
33	Bacteroides caccae	1	1	1	1	1	1	1	0	B12	NA	0.0214304	0.0113303	0.0268185	0.0096766	0.023359	0.025152	0.0236875	0.03381	0.0290915	0.0243636	0.047869	0.0504466	0.0224	0.0227732	0.035109	0.023989	0.0235975	0.048383	0.0257985	0.0126854	0.0362516	0.0237963	0.0369916	0.0233332	0.033866	0.0468568	0.0252143	0.0356648	0.0329439	0.0481538	0.0236227	0.0372393	0.0442673	0.0360972	0.034314	0.0447325		0.0196278
34	Bacteroides massiliensis	1	1	1	1	1	1	1	0	B12	NA	0.000107	0.0003118	0.0002904	0.0024289	0.0001135	0.0011046	0.0023567	0.012278	0.004151	0.0096709	0.011919	0.0033407	0.001108	0.000897	0.00158069	0.002465	0.0003662	0.002918	0.01168	0.003491	0.01204	0.009541	0.031231	0.0140913	0.011499	0.013441	0.0144862	0.006931	0.0144974	0.014528	0.0260396	0.014578	0.0106474	0.0075749	0.010357	0.0171962		0.000726033
35	Bacteroides ovatus	1	1	1	1	1	1	1	0	B12	NA	0.005659	0.009452	0.0086335	0.0076485	0.0075773	0.0099156	0.0085102	0.017065	0.0052695	0.0066659	0.008315	0.0061393	0.011265	0.0139861	0.00826841	0.0049335	0.0068233	0.013711	0.0056783	0.007484	0.0074472	0.003837	0.0091345	0.0044574	0.005262	0.0052798	0.0027717	0.0009375	0.0121231	0.0065874	0.002601	0.0061783	0.0057666	0.00571116	0.007763	0.0035132		0.00814765
36	Bacteroides caecimuris	1	1	1	1	1	1	1	0	B12	NA	0.0003934	0.0048709	0.0015095	0.0021013	0.00081292	0.00230956	0.007254	0.001395	0.002319	0.0015766	0.008995	0.00377	0	0.000841	0.00076245	0.00144336	0.0037716	0.002159	0.000846	0.0008484	0.0014264	0.0017356	0.001989	0.00319942	0.000967	0.0008686	0.001524	0.00159	0.00460622	0.0010848	0.0030998	0.001518	0.000844	0.00203126	0.004026	0.0006252		0.0019996
37	Bacteroides salyersiae	1	1	1	1	1	1	1	0	B12	NA	0.001432	0.002	0.000639	0.001539	0.000975	0.00305	0.00373	0.00298	0.001245	0.000607	0.001574	0.001361	0	0.00342	0.00165	0.001287	0.001949	0.001016	0.000765	0.001837	0.001347	0	0	0.002125	0.00043	0	0	0.0003668	0	0.001422	0.001315	0	0.001092	0.00292	0.001438	0.001954		0.00160583
38	Bacteroides faecichinchillae	1	1	1	1	1	1	1	0	B12	NA	0.000179	0.0003588	0.0005418	0.0006401	0.0003121	0.0007825	0.0006293	0.000558	0.000704	0.0009406	0.000899	0.0006578	0.000185	0.0005051	0.00055866	0.0005657	0.0143573	0.001905	0.000483	0.0004648	0.000713	0.0004704	0.0004306	0.00060266	0.000644	0.000556	0.0022583	0	0.00030031	0.0003738	0.0002982	0.0005292	0.0002729	0.00055036	0.000288	0.0006244		0.00046905
39	Bacteroides vulgatus	1	1	1	1	1	1	1	1	P	NA	0.0198362	0.0175328	0.0204593	0.0310866	0.0215033	0.0232865	0.035319	0.077767	0.0187525	0.0255514	0.020119	0.0257892	0.025313	0.0282454	0.0177044	0.0157762	0.0219002	0.03587	0.0204993	0.0243364	0.0199792	0.0219056	0.0612807	0.0270225	0.039537	0.0189834	0.0295303	0.0208829	0.0393821	0.015486	0.0260745	0.0218984	0.0242445	0.0279835	0.042579	0.0222822		0.0267673
40	Bacteroides uniformis	1	1	1	1	1	1	1	1	P	NA	0.0140916	0.0140635	0.0105112	0.0180411	0.0224805	0.0214187	0.0174572	0.051768	0.009832	0.0194592	0.010119	0.0212306	0.017704	0.022804	0.0086908	0.0107527	0.0229975	0.021682	0.0069319	0.020989	0.012442	0.0096932	0.0331021	0.0154508	0.012359	0.0091925	0.0162993	0.0162631	0.0196591	0.0091334	0.0123405	0.0142973	0.0113862	0.0188054	0.017694	0.0164172		0.0186169
41	Parabacteroides merdae	1	1	1	1	1	1	1	1	P	NA	0.010572	0.0105749	0.0104454	0.031071	0.0103252	0.0103732	0.020639	0.010279	0.051657	0.0106366	0.010225	0.0097347	0.01037	0.0107011	0.0105308	0.010621	0.0090742	0.010381	0.0206043	0.0078532	0.0082392	0.0094392	0.008988	0.0103909	0.00548	0.0102445	0.010231	0.0104485	0.007575	0.009274	0.0086123	0.0103176	0.0106205	0.0079367	0.010432	0.008874		0.0143451
42	Parabacteroides goldsteinii	1	1	1	1	1	1	1	1	P	NA	3.58e-05	3.59e-05	0.00141	0.000369	0	0.0200439	0.00117	0	0	0.00558	0.02	0	0	0.000112	0.0044217	0.000201	0.0300203	0	0.000403	0.0030304	0	0.000181	0	0.000126	0.000752	0	0.0063662	0	0.0100182	0.0034774	0.00213	0	0	0.000288	0	0.00203		0.00463331
43	Parabacteroides distasonis	1	1	1	1	1	1	1	1	P	NA	0.002395	0.0026089	0.0065088	0.0124889	0.00951182	0.00612994	0.003365	0.00344	0.004482	0.0053403	0.002695	0.0056539	0.000923	0.002329	0.00375009	0.00548483	0.00346	0.01257	0.003177	0.0046602	0.00412	0.0031804	0.0074636	0.0032644	0.005477	0.0028243	0.0038262	0.0057846	0.00216331	0.0045594	0.002337	0.00374	0.0035028	0.00401536	0.00445	0.007817		0.00517425
44	Bacteroides dorei	1	1	1	1	1	1	1	1	P	NA	0.001396	0.002621	0.001412	0.0023106	0.0057649	0.001271	0.002364	0.00465	0.002486	0.007094	0.00292	0.0047377	0.002033	0.0059451	0.00326168	0.0102555	0.0013193	0.00521	0.000926	0.0023	0.002615	0.002424	0.030615	0.00231163	0.003542	0.003802	0.001943	0.001059	0.00277	0.001384	0.002231	0.00272	0.001591	0.0029689	0.002593	0.005353		0.0037251
45	Phascolarctobacterium faecium	1	1	1	1	0	1	1	1	mixed	NA	0	1.2e-05	1.94e-05	1.23e-05	0	0	0.08178	0.052141	0.000996	0	0.031125	0	0	0	0	0	2.03e-05	0	0	0	0	0.0103622	4.1e-05	0.05116	0.040752	4.45e-05	0	0.041141	0	3.74e-05	0	0.071412	0	1.69e-05	0	0.071681		0.00922811
46	Clostridium subterminale	0.61	0.87	0.61	0.28	0.68	0.65	0.9	0.62	mixed	NA	0	0	0	0	0	0	0	0.006701	0	3.03e-05	0	0	0	2.8e-05	0	0	0	0	0	0.008478	0	0	0	0.03211	0	0	0	0.06387	9.11e-06	0	0.008161	0	0	0	0	0.01168		0.000375517
47	Anaerotignum lactatifermentans	1	1	1	1	0	0	0	0	mixed	NA	0	0	0	0	0	7.32e-06	0	0	0	3.03e-05	0	0	0	2.8e-05	0	0	0	0	4.03e-05	0.06	0.00301	0.0001452	0	0.00886	0	0.02	0	0	0	0	0	7.06e-05	0.01782	0.01922	0	7.82e-05		3.64556e-06
48	Bacteroides xylanisolvens	1	1	1	1	1	1	1	0.25	mixed	NA	0.0020036	0.0110718	0.0016468	0.002462	0.0025398	0.0026948	0.002332	0.004838	0.001451	0.0013629	0.001125	0.002018	0.002953	0.004851	0.0022888	0.0016745	0.0022332	0.000889	0.0028595	0.002923	0.001983	0.0014472	0.002283	0.001837	0.001396	0.0026743	0.0005544	0.0002038	0.007073	0.0025834	0.0011164	0.002186	0.0018153	0.0019002	0.002443	0.0010942		0.00280196
49	Hydrogenoanaerobacterium saccharovorans	0.3	0.36	0.23	0.18	0.53	0.37	0.43	0.6	mixed	NA	0.0014	0.000742	0.0006	0.00122	0.000719	0.000936	0.00119	0.00102	0.0012	0.000819	0.000225	0.0011	0	0.00107	0.000956	0.00116	0.00112	0	0.00121	0.000747	0.000871	0.00166	0.00185	0.00132	0	0.00149	0	0.00208	0.0027	0.0021	0.00109	0.00113	0.00179	0.00164	0.000719	0.00184		0.000859833
50	Lachnoclostridium pacaense	0.29	0.57	0	0.14	0.5	0.07	0.22	1	mixed	NA	0	0	0	0	0	1.46e-05	0	0	0	0	0	0	0	0	2.34e-06	0	0	0	0	0	0.001109	0	0.02794	0	0	0	0	0	0	0	0.003818	0	0	0	0	0.00993		9.41111e-07
50	phylotypes																																														MAX		0.240445
																																															MIN		9.41111e-07
11	B1, B2, B5, B7																																																0.115064
8	B1, B2, B5																																																0.0880995
7	B1, B5 etc																																																0.0589003
10	B12																																																0.605077
6	P																																																0.0732619
42	total of these categories																																																0.940403
																																																	0.262064
[truncated: 4 more columns]

## Sheet: 2D
Table S2D. Predicted Community Phenotype Indices (CPI) for in vitro experimental samples.
In vitro Experiment	B vitamin auxotrophy indices								Standard deviation
	B1	B2	B3	B5	B6	B7	B9	B12	B1	B2	B3	B5	B6	B7	B9	B12
AD	24.0667	17.5167	21.6	30.7167	27.05	31	14.6	72.0333	2.74202	6.04497	3.28207	2.85896	4.84799	4.0403	6.04152	4.71494
AN	22.0667	17.8667	25.1167	30.5667	24.4833	29.4167	12.1833	75.4	9.98973	5.7992	8.12759	9.91477	8.85108	8.53215	4.30972	6.22029
AE	16.5167	13.0333	17.7333	30.9167	28.1667	30.35	14.3	66.9333	3.72259	4.67746	4.68814	5.94623	6.9284	4.01136	5.96992	8.58526
4D4N	18.2833	15.2	20.8167	24.0167	20.8167	25.3667	12.7833	72.5833	3.37723	5.98398	5.98545	4.04397	6.13658	4.73695	5.05981	7.71995
4E4N	15.5	12.7833	16.2167	27.8667	24.3667	26.3167	10.4	71.35	9.50726	8.07773	6.14212	9.06304	9.51833	6.92688	5.52014	7.77502
7D1N	17.9833	11.1333	15.4667	26.0333	23.9	25.8667	9.63333	76.4333	7.60037	2.75076	5.28797	5.99122	6.34571	5.91563	3.38093	4.19126
7E1N	18.6667	15.6167	22.2	27.75	25.35	27.2667	16.1167	71.5833	4.79402	5.95732	5.11859	4.09133	4.71498	3.43841	7.17256	3.93264

## Sheet: 2E
Table S2E. LC-MS measurements of selected B vitamins for in vitro experimental samples.
Sample type:	Cell pellets									Supernatants									Media controls
Media/DIET type:	AD			AN			AE			AD			AN			AE			AD	AN	AE
Sample ID:	V1	V2	V3	V7	V8	V9	V4	V5	V6	V10	V11	V12	V16	V17	V18	V13	V14	V15	V19	V21	V20
Estimated cell number(10^8)*	5.16	4.92	5.16	4.68	3.96	5.04	6.84	7.8	7.32
Measured vitamin levels**
B1 (Thiamine)	3.7	7.99	2.76	442.16	230.15	262.23	6663.96	7680.84	8227.32	1.32	2.412	1.343	1179.47	856.87	1140.28	12141.4	12467.5	12441.6	4.312	1232.75	12861.9
B2 (Riboflavin)	12.23	48.04	10.67	223.81	123.46	90.79	3122.77	3049.43	143.54	21.42	17.2065	12.53	1667.56	1565.64	1878.6	17346.4	18528.5		0.6	1683.15	19821
B3 (Nicotinic acid)	70.34	70.75	53.05	63.39	201.14	339.22	2859.48	3777.5	3474.85	2.33	2.53	2.34		814.7	1140.33	14866.6	14981.1	14982.8	0	1065.53	16832.4
B5 (Pantothenate)	46.73	40.95	56.85	285.5	191.26	126.17	3233.11	3985.9	2747.91	75.11	10.8438	38.62	1706.66	1664.89	1421.16	23466	28288.5	22704.1	0.18	1399.65	15915.8
*Based on 1 OD = 8X10^8 cells/ml													outlier					outlier
**For cell pellet, the unit is ng/1X10^8 cell. For media, the unit is ng/mL
