# Supplementary material for: B-Vitamin Sharing Promotes Stability of Gut Microbial Communities
Source: Front Microbiol. 2019 Jul 2;10:1485. doi: 10.3389/fmicb.2019.01485 (PMC6615432; doi:10.3389/fmicb.2019.01485)
Supplement: Supplementary file 4 [file Table_3.XLSX]

## Sheet: Sheet2
Table S3. The effect of renormalization by 16S rDNA copy number on the relative abundance of top 20 genera.
In vitro					In vivo					HMP
Genus	mean 16S count*	average abundance	average abundance renormalized	Abundance change, %	Genus	mean 16S count*	average abundance	average abundance renormalized	Abundance change, %	Genus	mean 16S count*	average abundance	average abundance renormalized	Abundance change, %
Bacteroides	5.1	43.9819	40.6069	-0.0767361	Akkermansia	3	27.2018	36.8061	0.353077	Bacteroides	5.1	50.2699	44.5475	-0.113834
Flavonifractor	2	7.10905	16.6514	1.34229	Bacteroides	5.1	17.1194	13.154	-0.231631	Alistipes	2	5.59082	11.9467	1.13685
Escherichia	7	18.9783	13.1064	-0.3094	Muribaculum	4	5.576	5.68389	0.0193498	Faecalibacterium	6	5.16131	3.90155	-0.244077
Akkermansia	3	4.24167	6.38333	0.504912	Blautia	5	6.19905	5.07316	-0.181624	Parabacteroides	7	4.95208	3.26314	-0.341056
Peptoniphilus	4	5.16976	6.08143	0.176346	Alistipes	2	2.37768	4.81663	1.02577	Oscillibacter	3*	2.83714	4.08804	0.440901
Clostridium	9.1	6.89262	3.57214	-0.481744	Parabacteroides	7	7.90284	4.62316	-0.415001	Prevotella	4	2.6769	2.90865	0.086576
Pseudoflavonifractor	3.67*	3.0769	3.13476	0.0188037	Phascolarctobacterium	4.5*	3.25768	2.95663	-0.0924131	Ruminococcus	4	2.31563	2.54971	0.101088
Finegoldia	4	2.14024	2.52524	0.179887	Gemmiger	3.67*	2.66189	2.95263	0.109222	Blautia	5	1.54229	1.42588	-0.0754777
Phascolarctobacterium	4.5*	1.34833	1.53476	0.138266	Lachnoclostridium	5.6	3.93484	2.86579	-0.271689	Ruminiclostridium	8	1.26241	0.683796	-0.45834
Parabacteroides	7	1.92667	1.32905	-0.310183	Faecalibacterium	6	3.93253	2.71484	-0.309644	Barnesiella	5	1.00233	0.871224	-0.130798
Agathobaculum	3.67*	0.613095	0.765714	0.248932	Flavonifractor	2	0.882526	1.80168	1.04151	Roseburia	4	0.998898	1.15551	0.156785
Eggerthella	2.5	0.472619	0.747619	0.581864	Sutterella	3.08*	1.17011	1.56221	0.335103	Eisenbergiella	5.86*	0.979633	0.743878	-0.240657
Dorea	5.86*	0.604524	0.521429	-0.137456	Butyricimonas	4*	1.07316	1.09684	0.0220696	Dialister	5	0.959592	0.84351	-0.12097
Neglecta	3.67*	0.262619	0.34119	0.299184	Desulfovibrio	3.7	1.05568	1.06968	0.0132615	Parasutterella	3.08*	0.940776	1.38049	0.467396
Blautia	5	0.254524	0.248095	-0.0252572	Murimonas	5.86*	1.19874	0.849579	-0.291272	Phascolarctobacterium	4.5*	0.908653	0.915918	0.00799569
Enterococcus	5.5	0.200952	0.244762	0.218009	Robinsoniella	5.86*	1.13232	0.794632	-0.298224	Eubacterium	6	0.906857	0.677347	-0.253083
Hungatella	8.21*	0.371429	0.225714	-0.392308	Oscillibacter	3*	0.542526	0.738947	0.362049	Paraprevotella	4*	0.767184	0.860571	0.121728
Lachnoclostridium	5.6	0.259286	0.215952	-0.167126	Erysipelatoclostridium	9*	1.57968	0.719579	-0.544479	Sutterella	3.08*	0.764571	1.13102	0.479287
Catabacter	-	0.208333	0.204286	-0.0194286	Tidjanibacter	2	0.338211	0.680842	1.01307	Muribaculum	4	0.729714	0.808939	0.108569
Anaerotignum	7	0.31	0.204048	-0.341782	Ruminococcus	4	0.624526	0.636211	0.0187089	Gemmiger	3.67*	0.692408	0.85098	0.229014
Anaerotruncus	3.67*	0.129048	0.169524	0.313653	Negativibacillus	3.67*	0.476316	0.530947	0.114696	Sporobacter	11	0.59302	0.708449	0.194645
Hydrogenoanaerobacterium	3.67*	0.115238	0.153333	0.330579	Turicimonas	3.08*	0.360316	0.472842	0.312299	Odoribacter	4	0.547878	0.606735	0.107428
Collinsella	5	0.129286	0.129048	-0.00184162	Coprococcus	5.86*	0.653895	0.464421	-0.289762	Cutibacterium	2.7	0.375796	0.388408	0.0335614
Paeniclostridium	17	0.409286	0.115476	-0.717859	Barnesiella	5	0.550842	0.449474	-0.184024	Akkermansia	3	0.287102	0.402204	0.40091
* mean 16S counts for respective taxonomic families (from rrnDB database)
Highlighted genera with mean 16S count less or equal 4
